# Supplementary material
Source: publisher figshare collection journal article supplement (https://acs.figshare.com/ndownloader/files/3812389)
Supplement: Supplementary file 1 [file 3812389]

## Supporting information

# Injection Moulded Polymeric Micropatterns for Bone Regeneration Study

*E. Zanchetta<sup>1</sup>, E. Guidi<sup>2</sup>, G. Della Giustina<sup>1</sup>, M. Sorgato<sup>1</sup>, M. Krampera<sup>3</sup>, G. Bassi<sup>3</sup>, R. Di Liddo<sup>2</sup>, G. Lucchetta<sup>1</sup>, M.T. Conconi<sup>2</sup>, G. Brusatin<sup>1,\*</sup>*

<sup>1</sup> Department of Industrial Engineering, University of Padua , Padua 35131 , Italy

\*e-mail: giovanna.brusatin@unipd.it

<sup>2</sup> Department of Pharmaceutical and Pharmacological Sciences, University of Padua , Padua 35131, Italy

<sup>3</sup> Section of Hematology, Department of Medicine, University of Verona , Verona 37129 , Italy

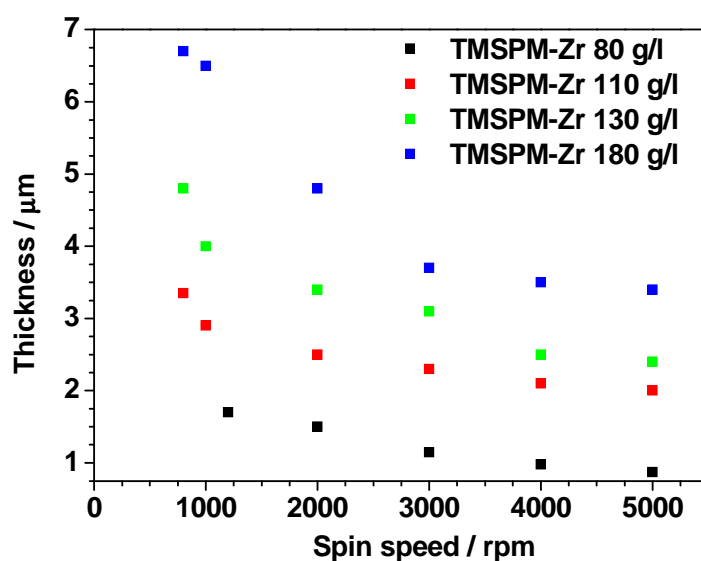

**Figure S1.** Spin-speed curves of differently diluted TMSPM-Zr solutions

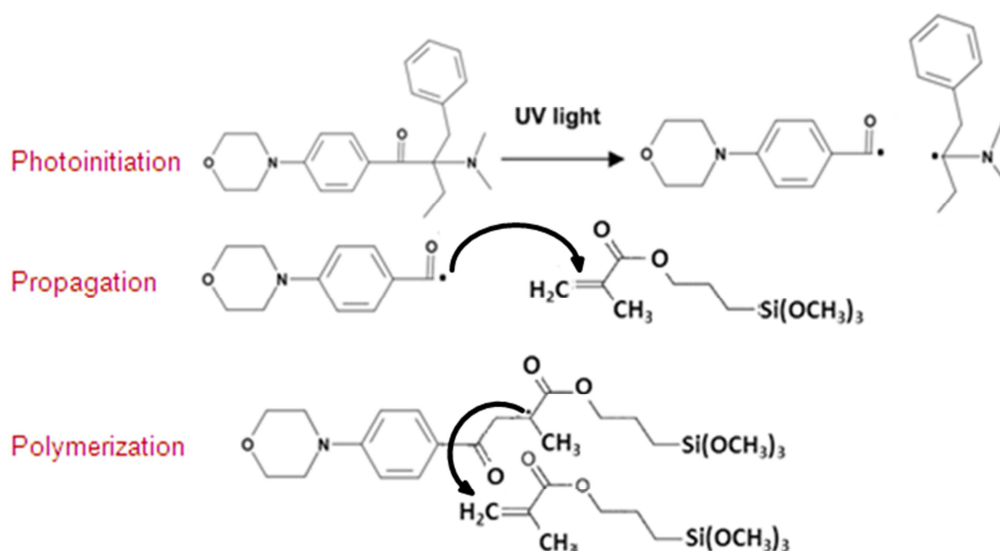

**Scheme S1.** Photopolymerization process of TMSPM with the addition of Irgacure 369

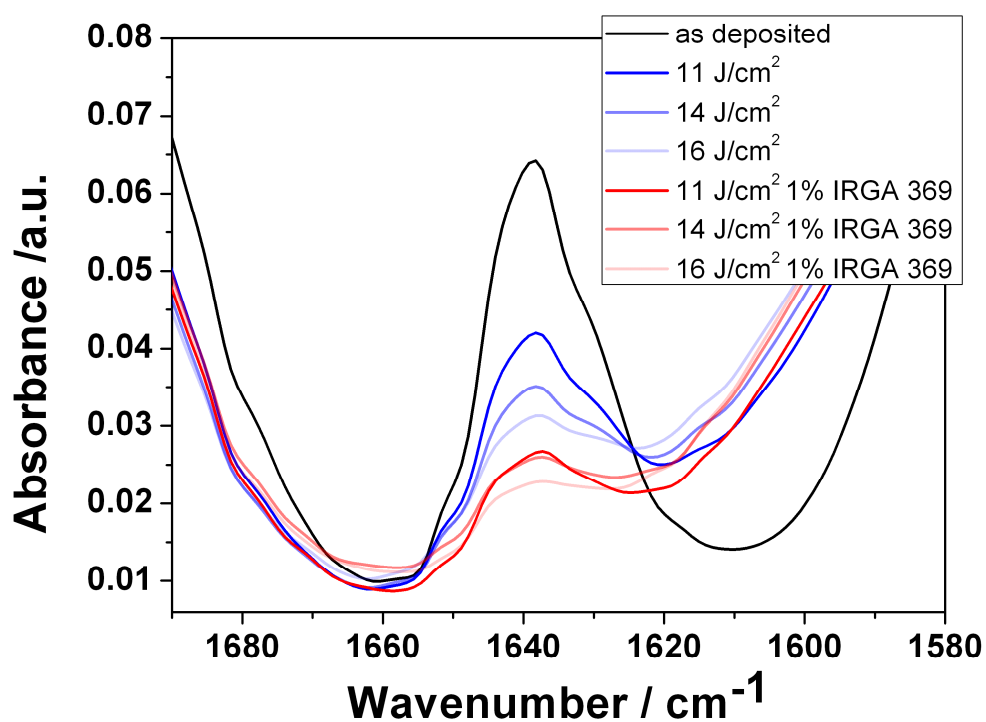

**Figure S2.** Comparison of the C=C photo-polymerization without photoinitiator (blue lines) and with the addition of Irgacure 369 1% molar with respect to TMSPM (red lines)

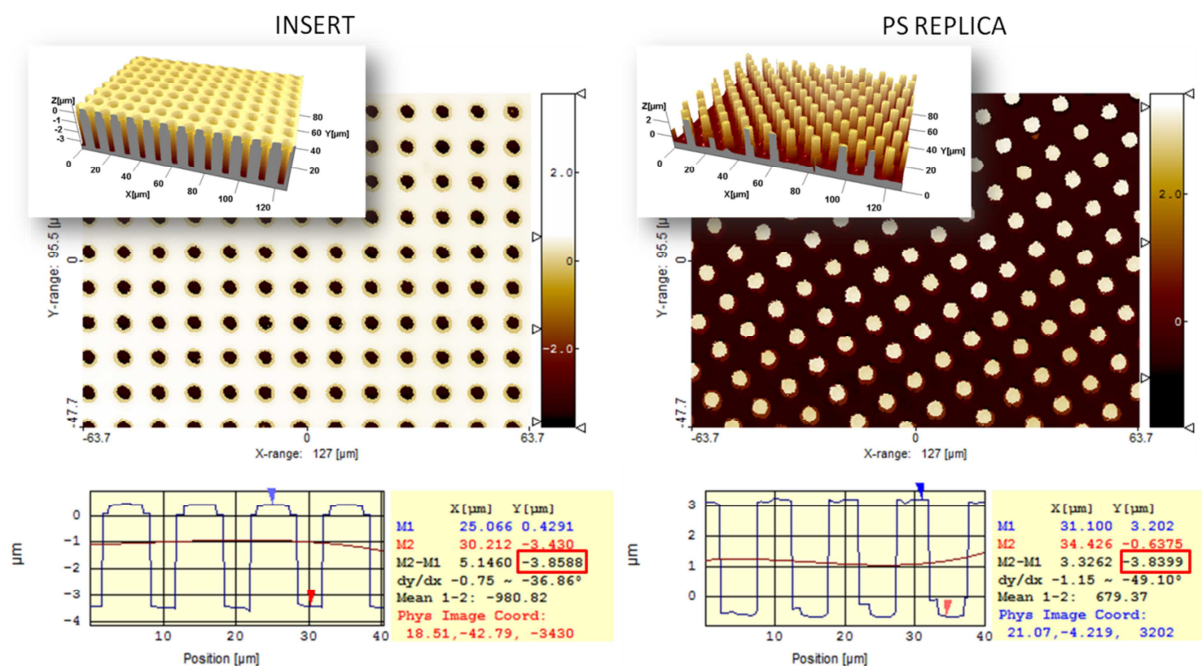

**Figure S3.** Example of 3D optical profiler image of the insert (left) and of the respective PS replica (right)

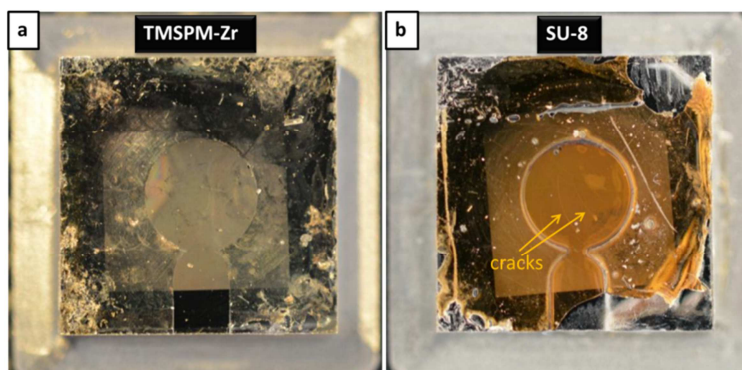

**Figure S4.** Micro-patterned stamps for micro-injection moulding obtained in (a) TMSPM-Zr and (b) SU8-2100 negative photoresist (MicroChem, Newton, MA) obtained according to manufacturer's instructions, after injection moulding at 90°C. While TMSPM-Zr stamp withstands at least 300 cycles at 90°C, SU8-2100 photoresist shows cracks formation after 50 injection moulding cycles.

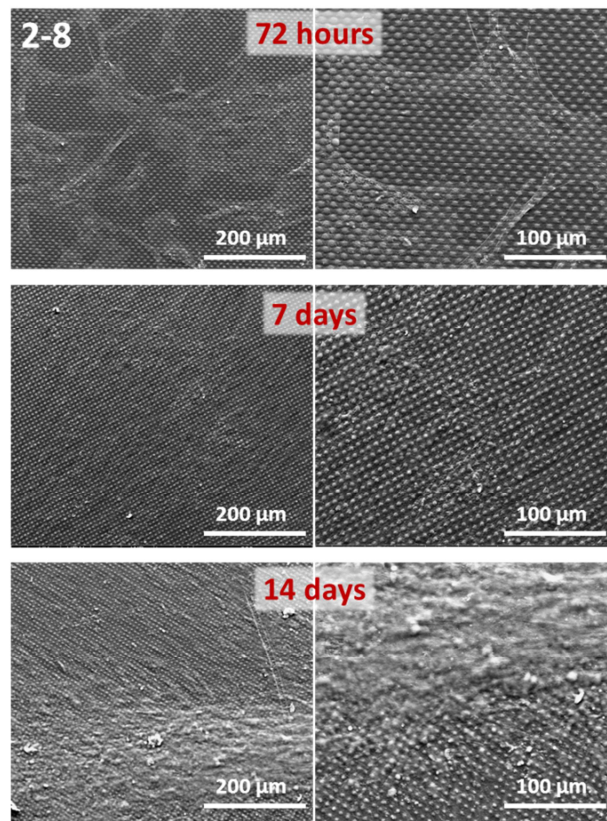

**Figure S5.** Cell proliferation at 72 hours, 7 and 14 days after seeding on 2-8 pillar-structured polystyrene surfaces: cells stratified after 7 days of proliferation
